# Supplementary material
Source: PubMed Central journal article supplement (PMC3833451)
Supplement: NIHMS521088-supplement-supp__figures.pdf [file NIHMS521088-supplement-supp__figures.pdf]

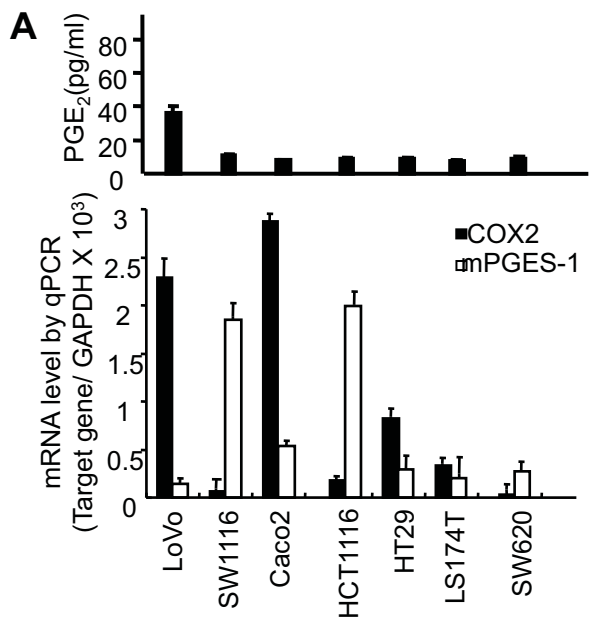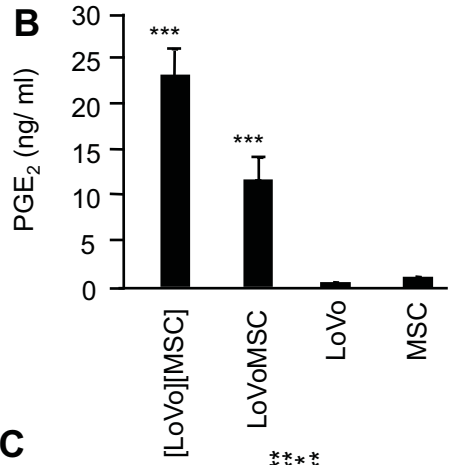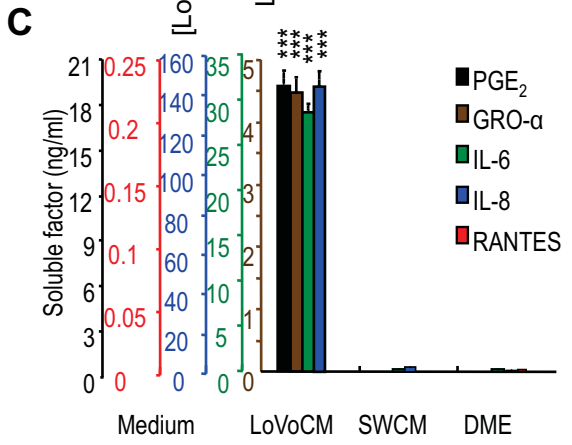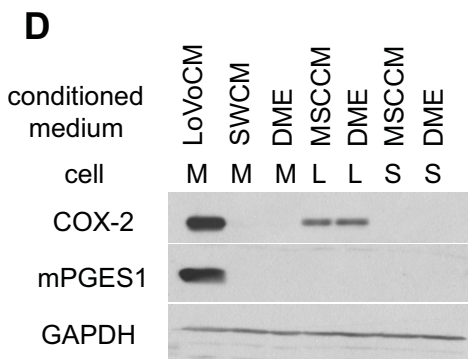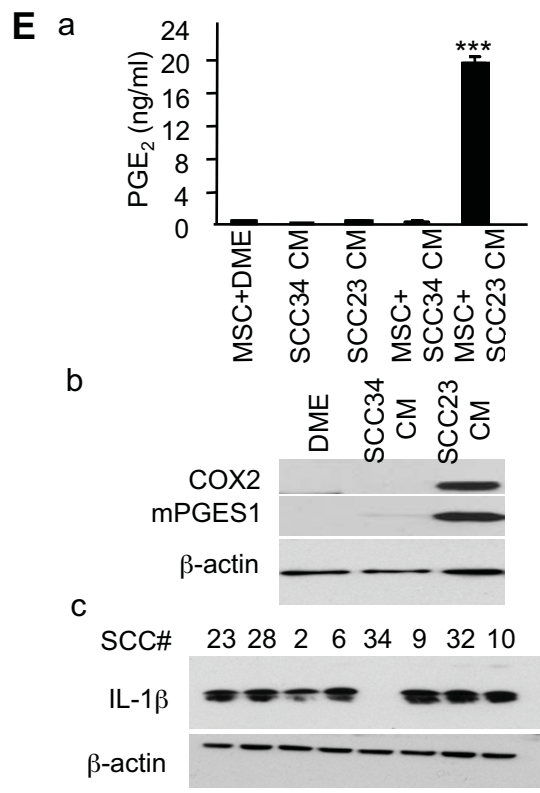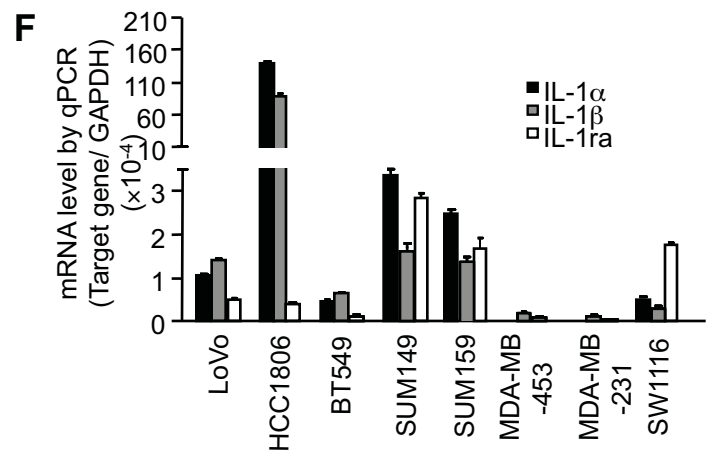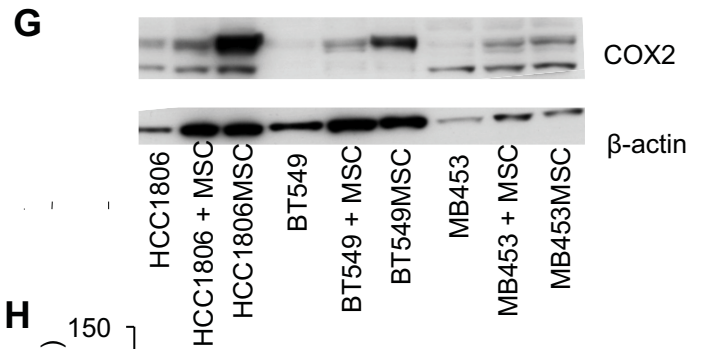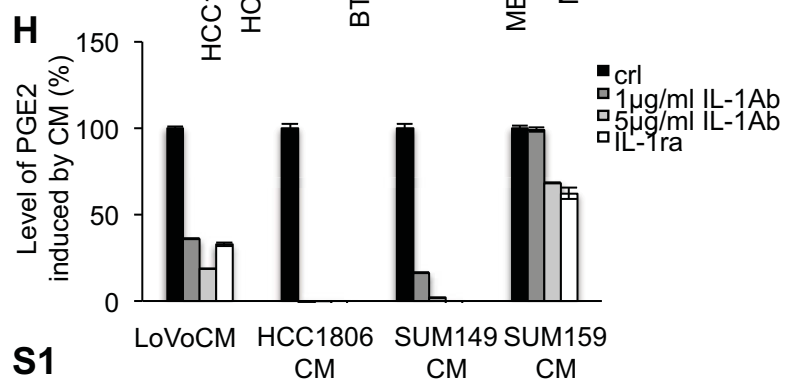

**Fig. S1**

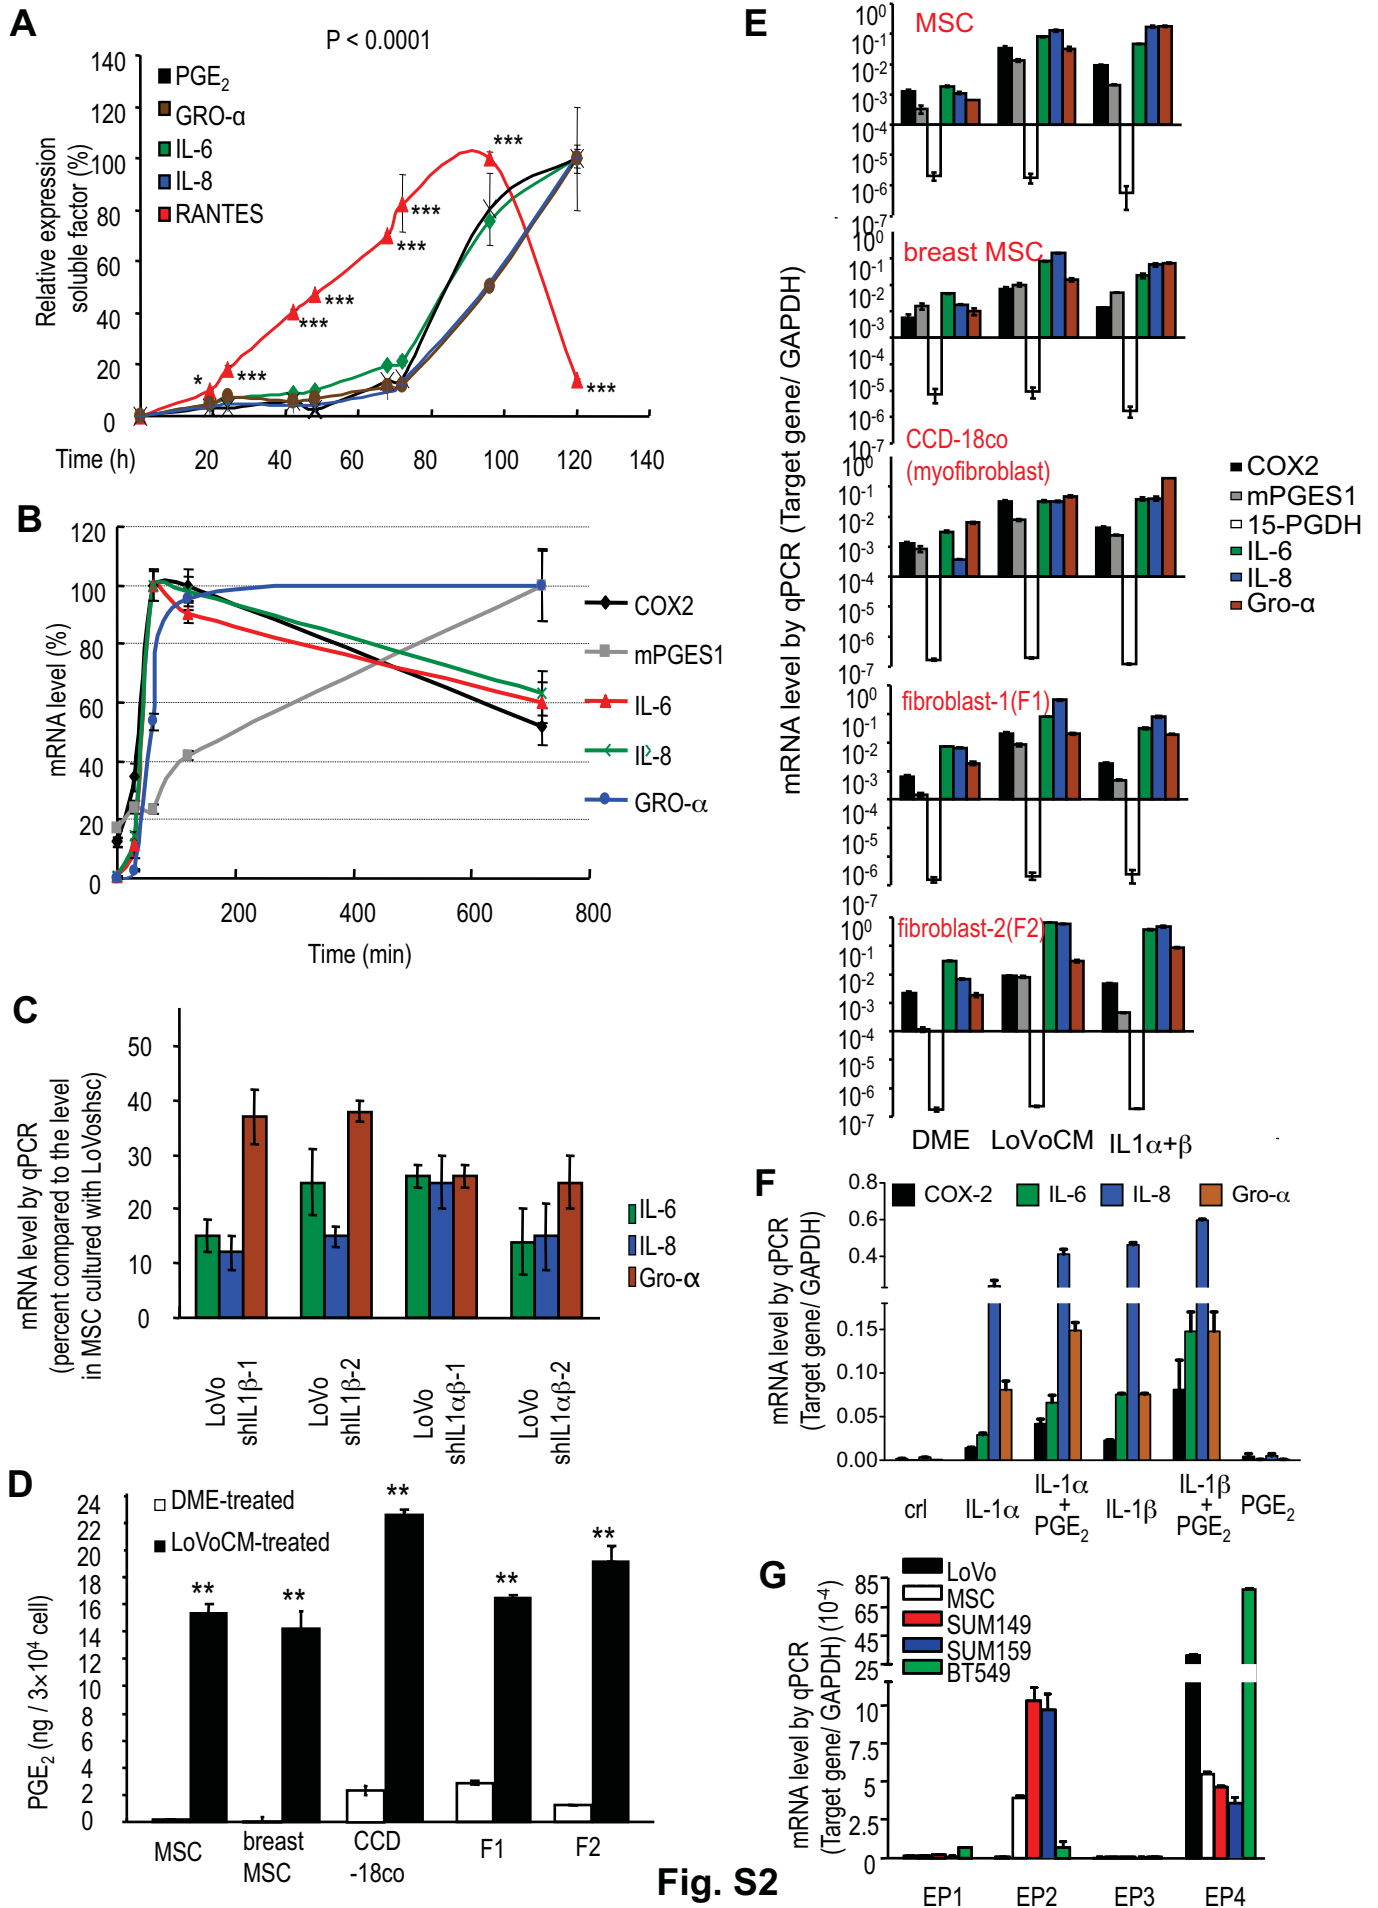

**Fig. S2**

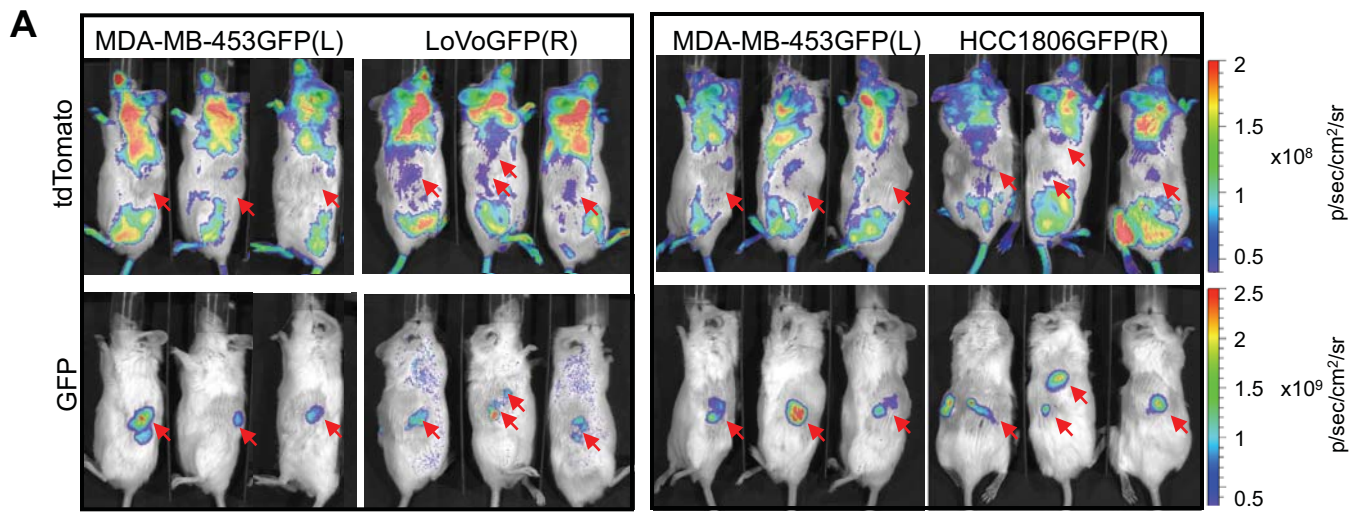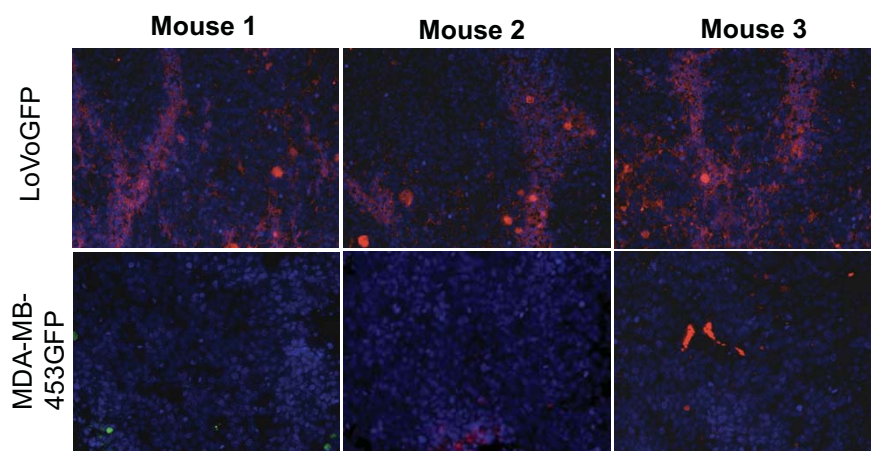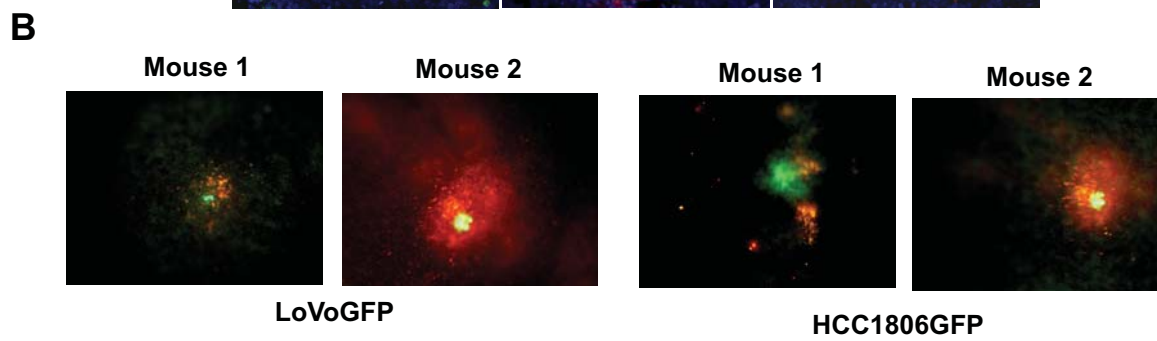

**Fig. S3**

**A**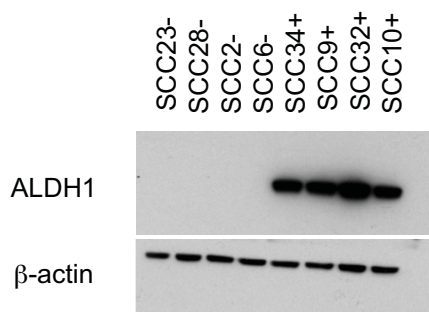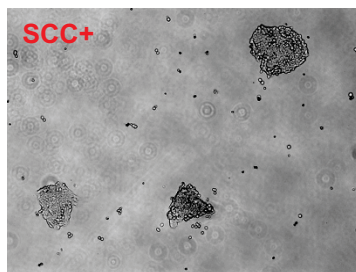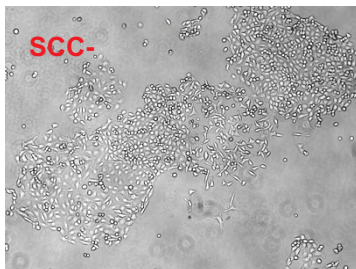**B**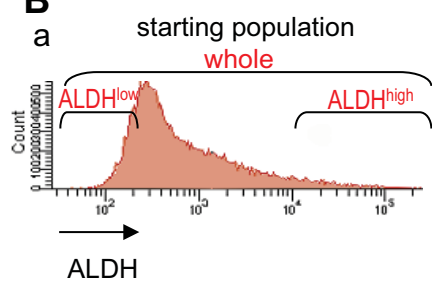**b**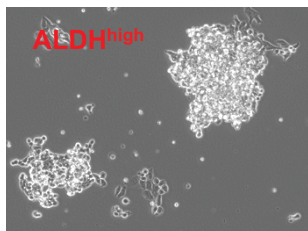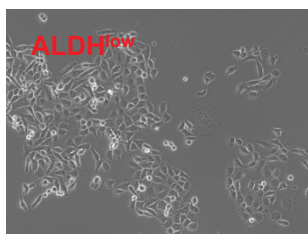**C**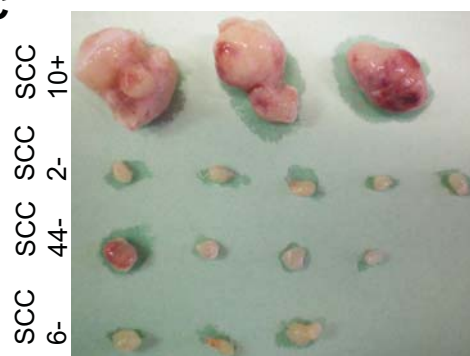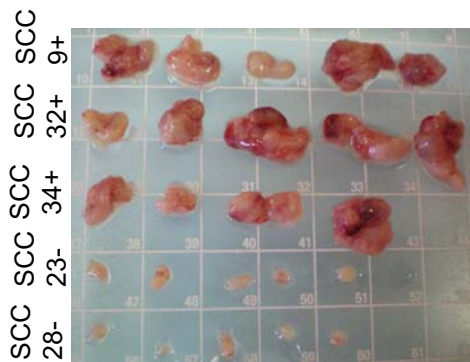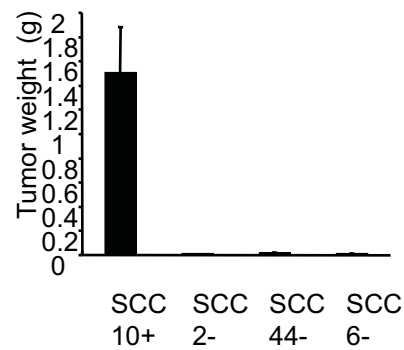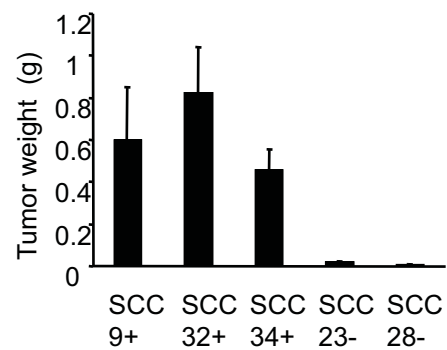**Fig. S4**

**A**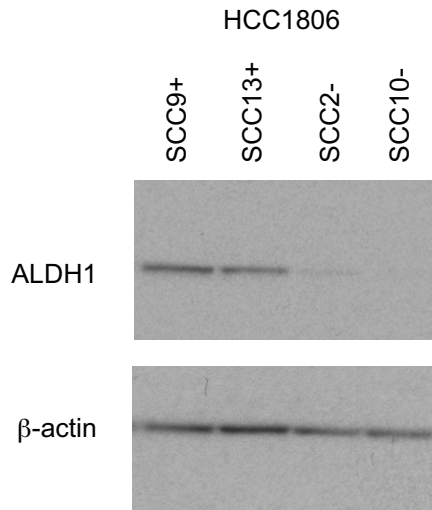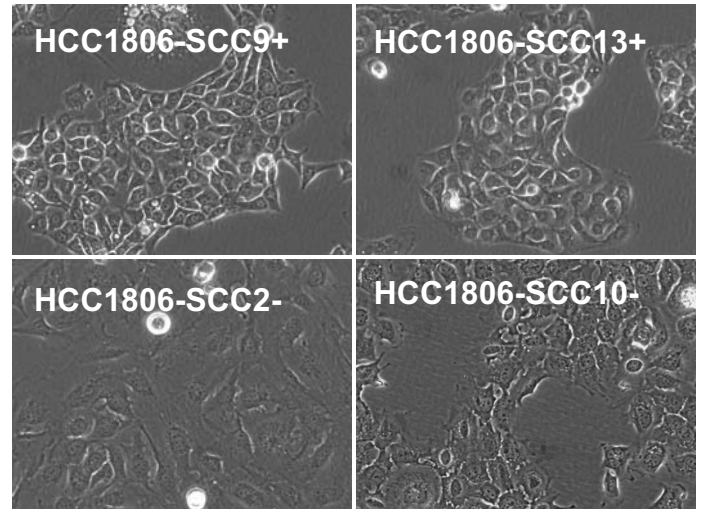**B**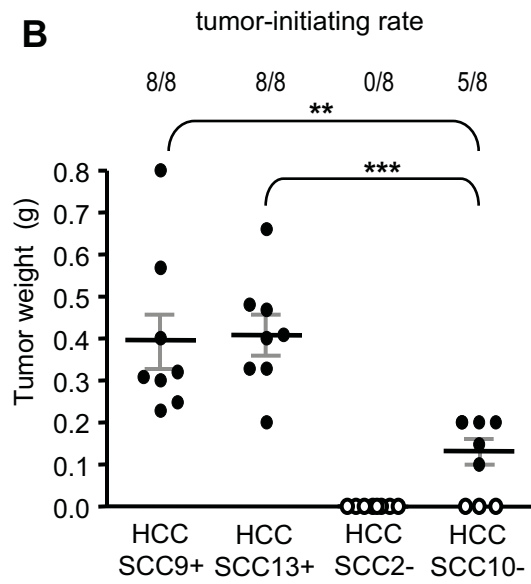**C**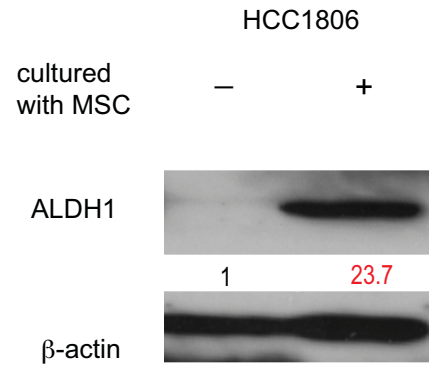**Fig. S5**

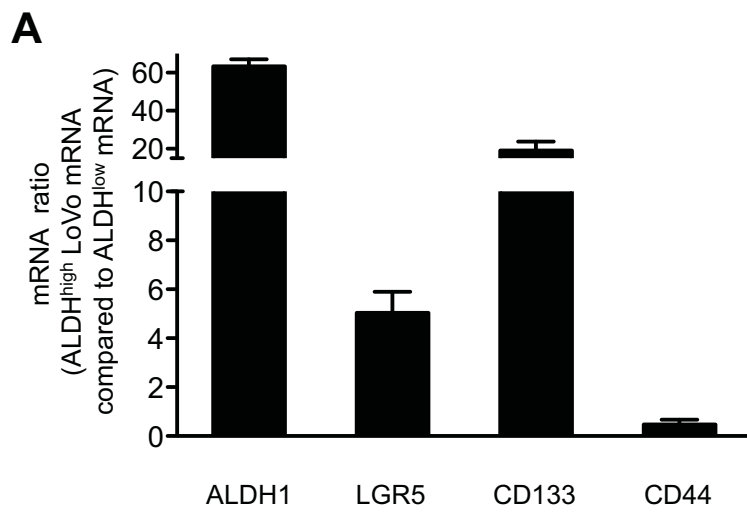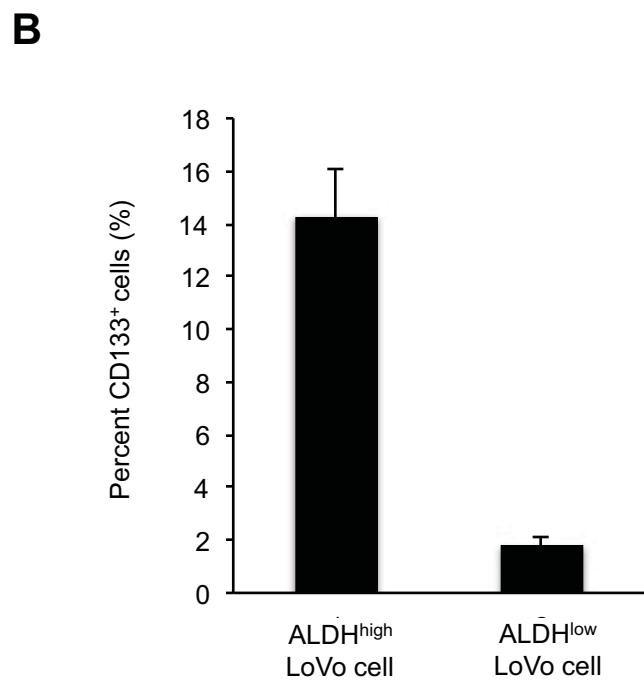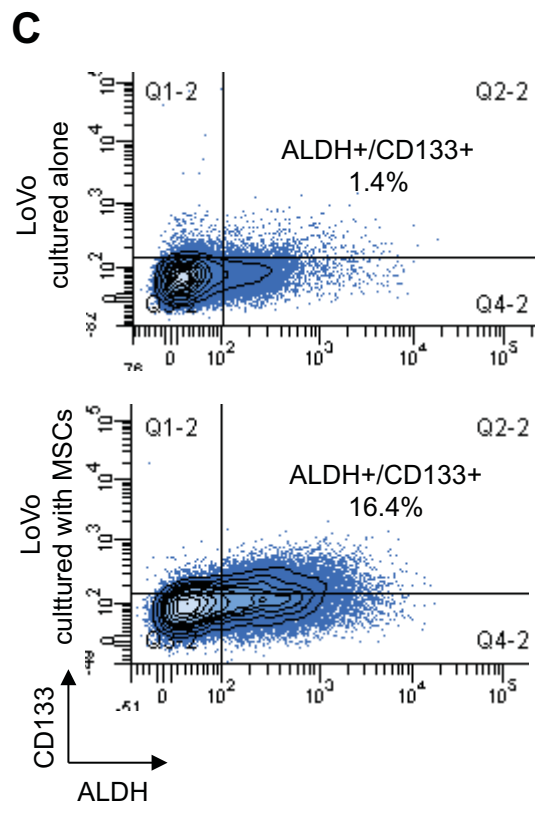

**Fig. S6**

**A**

| Number of cells /injection | Type of injected cell              |                                       |
|----------------------------|------------------------------------|---------------------------------------|
|                            | LoVo (after 5-day culturing alone) | LoVo (after 5-day culturing with MSC) |
| $5 \times 10^4$            | 1/6                                | 5/6                                   |
| $5 \times 10^3$            | 0/6                                | 0/6                                   |

**B**

| Group                                 | Lower                | Estimate             | Upper                |
|---------------------------------------|----------------------|----------------------|----------------------|
| LoVo (after 5-day Culturing alone)    | $2.1 \times 10^{-6}$ | $3 \times 10^{-5}$   | $4.3 \times 10^{-4}$ |
| LoVo (after 5-day culturing with MSC) | $8.8 \times 10^{-4}$ | $3.5 \times 10^{-4}$ | $1.4 \times 10^{-4}$ |

**C**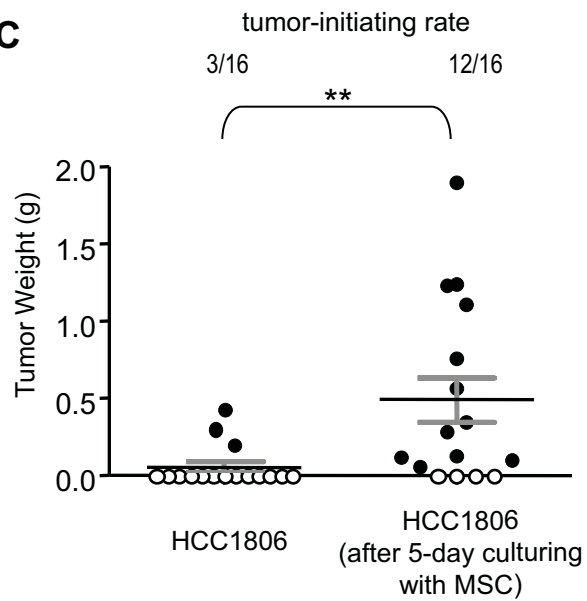**Fig. S7**

Pre-treatment *in vitro*

|                   | control | PGE <sub>2</sub> | PGE <sub>2</sub><br>+cytokines |
|-------------------|---------|------------------|--------------------------------|
| 1×10 <sup>6</sup> | 10/10   | 10/10            | 6/6                            |
| 1×10 <sup>5</sup> | 1/10    | 5/10             | 5/10                           |
| 1×10 <sup>4</sup> | 0/8     | 2/8              | 3/8                            |

P=0.037
P=0.782

P=0.017

Number of cells  
/injection

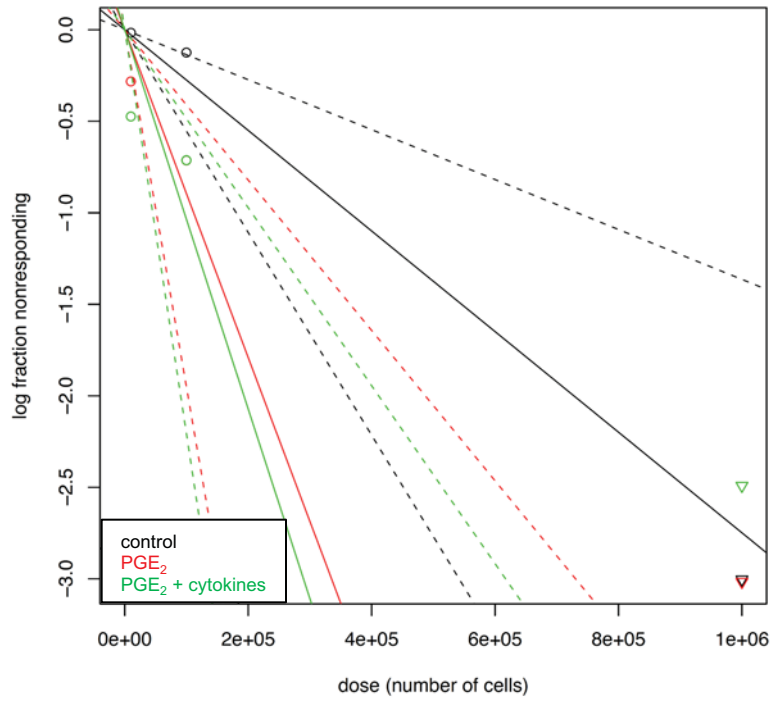

Fig. S8



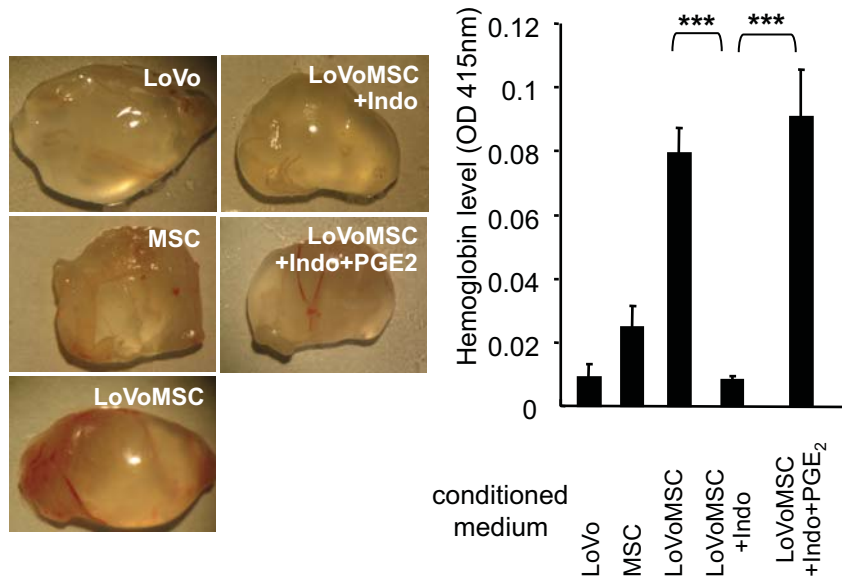

**Fig. S9**

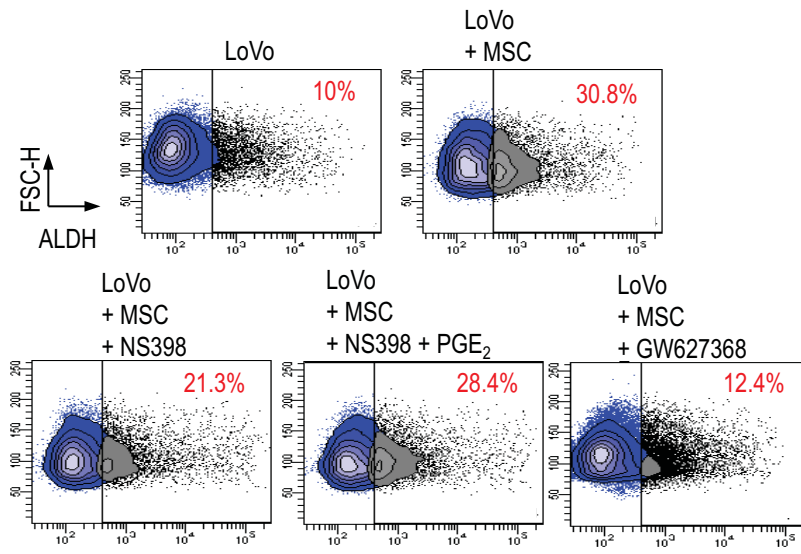

**Fig. S10**

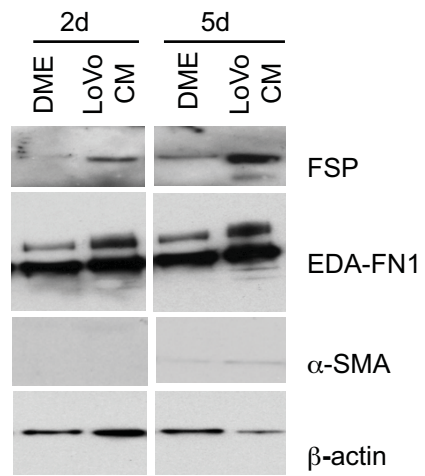

**Fig. S11**

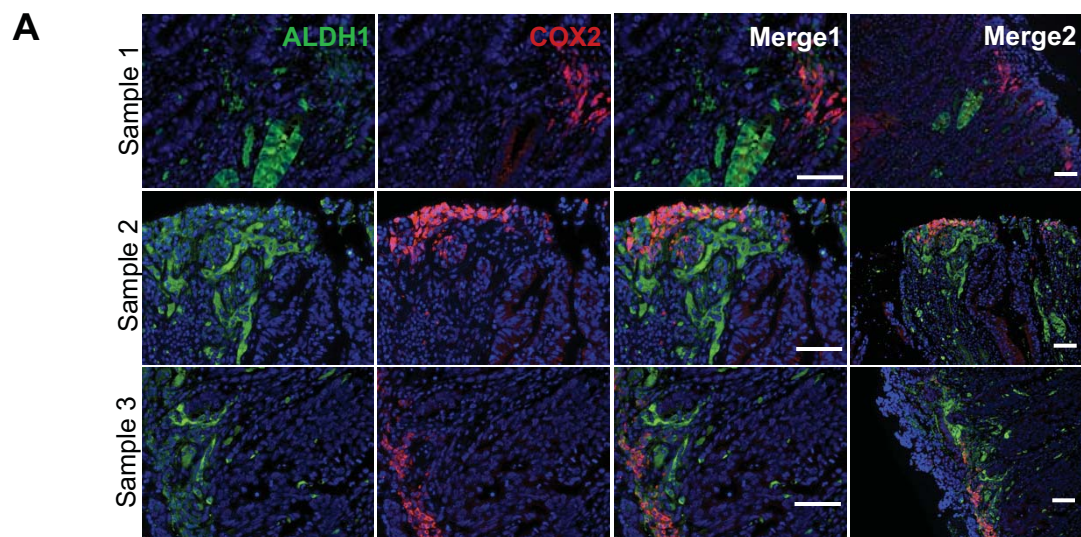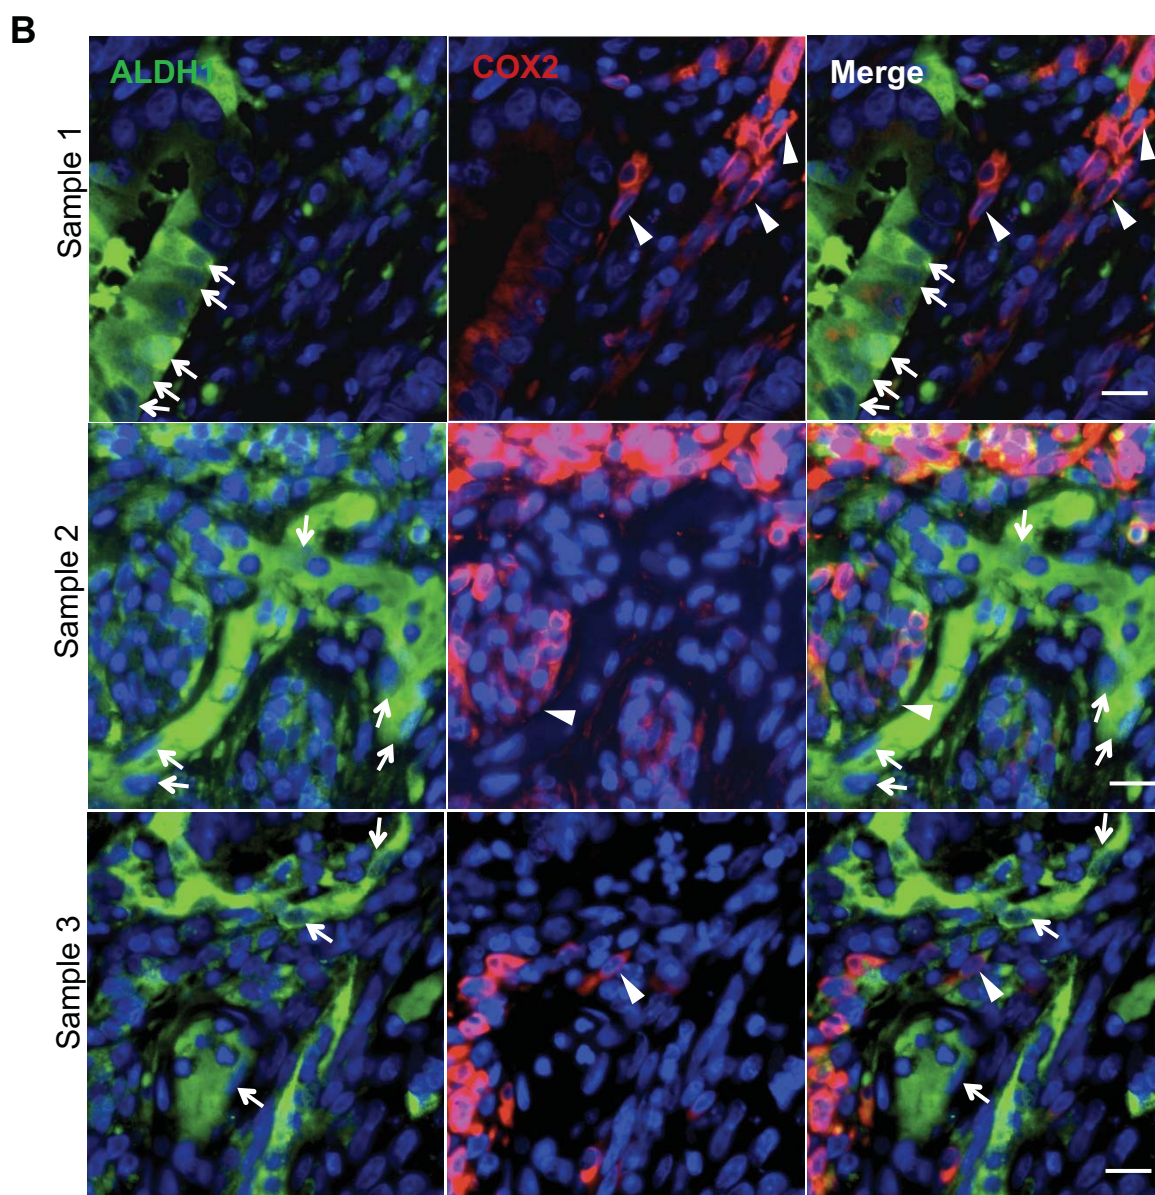

Fig. S12
